# Supplementary material for: Early and Late Onset Neonatal Sepsis: Epidemiology and Effectiveness of Empirical Antibacterial Therapy in a III Level Neonatal Intensive Care Unit
Source: MDPI journal article supplement (doi:10.3390/antibiotics11020284), 2022-02-21
Supplement: s1 [file s1]

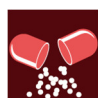

## Supplementary File

Table S1. yearly events number, and isolates strains stratified by EOS and LOS.

| Variable          | Subvariable                     | Total | EOS |          | LOS |          | P value |
|-------------------|---------------------------------|-------|-----|----------|-----|----------|---------|
|                   |                                 |       | N   | % on EOS | N   | % on LOS |         |
| Year              | 2005                            | 21    | 5   | 6,7      | 16  | 2,0      | 0,67    |
|                   | 2006                            | 75    | 12  | 16,0     | 63  | 8,0      |         |
|                   | 2007                            | 45    | 6   | 8,0      | 39  | 5,0      |         |
|                   | 2008                            | 35    | 4   | 5,3      | 31  | 4,0      |         |
|                   | 2009                            | 65    | 5   | 6,7      | 60  | 7,7      |         |
|                   | 2010                            | 63    | 4   | 5,3      | 59  | 7,5      |         |
|                   | 2011                            | 90    | 0   | 0,0      | 90  | 11,5     |         |
|                   | 2012                            | 137   | 4   | 5,3      | 133 | 17,0     |         |
|                   | 2013                            | 62    | 5   | 6,7      | 57  | 7,3      |         |
|                   | 2014                            | 54    | 8   | 10,7     | 46  | 5,9      |         |
|                   | 2015                            | 61    | 1   | 1,3      | 60  | 7,7      |         |
|                   | 2016                            | 53    | 4   | 5,3      | 49  | 6,3      |         |
|                   | 2017                            | 42    | 9   | 12,0     | 33  | 4,2      |         |
|                   | 2018                            | 56    | 8   | 10,7     | 48  | 6,1      |         |
|                   |                                 | 859   | 75  |          | 784 |          |         |
| Sample type       | Blood                           | 846   | 75  | 100      | 771 | 98,3     | <0,001  |
|                   | CSF                             | 13    | 0   | 0        | 13  | 1,7      |         |
|                   |                                 | 859   | 75  |          | 784 |          |         |
| Gram stain        | Positive                        | 747   | 61  | 81,3     | 686 | 87,5     | 0,13    |
|                   | Negative                        | 112   | 14  | 18,7     | 98  | 12,5     |         |
|                   |                                 | 859   | 75  |          | 784 |          |         |
| Microbial species | CoNS                            | 599   | 39  | 52       | 560 | 71,4     | <0,001  |
|                   | <i>Staphylococcus aureus</i>    | 61    | 4   | 5,3      | 57  | 7,3      |         |
|                   | <i>Enterococcus faecalis</i>    | 34    | 1   | 1,3      | 33  | 4,2      |         |
|                   | <i>Escherichia coli</i>         | 39    | 6   | 8,0      | 33  | 4,2      |         |
|                   | <i>Klebsiella pneumoniae</i>    | 20    |     |          | 20  | 2,6      |         |
|                   | <i>Streptococcus agalactiae</i> | 23    | 6   | 8,0      | 17  | 2,2      |         |
|                   | <i>Klebsiella oxytoca</i>       | 15    |     |          | 15  | 1,9      |         |
|                   | <i>Enterobacter cloacae</i>     | 11    |     |          | 11  | 1,4      |         |
|                   | <i>Streptococcus viridans</i>   | 6     |     |          | 6   | 0,8      |         |
|                   | <i>Serratia marcescens</i>      | 5     |     |          | 5   | 0,6      |         |
|                   | <i>Enterobacter aerogenes</i>   | 4     |     |          | 4   | 0,5      |         |
|                   | <i>Streptococcus mitis</i>      | 5     | 2   | 2,7      | 3   | 0,4      |         |
|                   | <i>Enterococcus spp.</i>        | 3     | 1   | 1,3      | 2   | 0,3      |         |
|                   | <i>Micrococcus species</i>      | 2     |     |          | 2   | 0,3      |         |
|                   | <i>Micrococcus luteus</i>       | 4     | 2   | 2,7      | 2   | 0,3      |         |
|                   | <i>Bacillus coagulans</i>       | 1     |     |          | 1   | 0,1      |         |
|                   | <i>Morganella morganii</i>      | 2     | 1   | 1,3      | 1   | 0,1      |         |
|                   | <i>Pseudomonas aeruginosa</i>   | 1     |     |          | 1   | 0,1      |         |
|                   | <i>Enterococcus hirae</i>       | 1     |     |          | 1   | 0,1      |         |
|                   | <i>Abiotrophia species</i>      | 1     |     |          | 1   | 0,1      |         |
|                   | <i>Enterobacter spp.</i>        | 1     |     |          | 1   | 0,1      |         |
|                   | <i>Streptococcus bovis</i>      | 1     |     |          | 1   | 0,1      |         |

|                                     |     |    |     |     |     |
|-------------------------------------|-----|----|-----|-----|-----|
| <i>Stenotrophomonas maltophilia</i> | 1   |    |     | 1   | 0,1 |
| <i>Citrobacter spp.</i>             | 1   |    |     | 1   | 0,1 |
| <i>Klebsiella spp</i>               | 1   |    |     | 1   | 0,1 |
| <i>Citrobacter koseri</i>           | 1   |    |     | 1   | 0,1 |
| <i>Serratia plymuthica</i>          | 1   |    |     | 1   | 0,1 |
| <i>Enterococcus faecium</i>         | 2   | 1  | 1,3 | 1   | 0,1 |
| <i>Streptococcus sanguinis</i>      | 2   | 1  | 1,3 | 1   | 0,1 |
| <i>Haemophilus influenzae</i>       | 2   | 2  | 2,7 |     |     |
| <i>Listeria monocytogenes</i>       | 2   | 2  | 2,7 |     |     |
| <i>Corynebacterium species</i>      | 2   | 2  | 2,7 |     |     |
| <i>Corynebacterium matruchotii</i>  | 1   | 1  | 1,3 |     |     |
| <i>Streptococcus pneumoniae</i>     | 1   | 1  | 1,3 |     |     |
| <i>Proteus mirabilis</i>            | 1   | 1  | 1,3 |     |     |
| <i>Streptococcus vestibularis</i>   | 1   | 1  | 1,3 |     |     |
| <i>Chryseobacterium indologenes</i> | 1   | 1  | 1,3 |     |     |
|                                     | 859 | 75 |     | 784 |     |

**Table S2.:** pathogens isolated in persistently positive blood cultures at 72 hours.

| Isolated Strain                          | Count | % Over Persistently Isolated Pathogens |
|------------------------------------------|-------|----------------------------------------|
| <i>Staphylococcus epidermidis</i>        | 5     | 50                                     |
| <i>Escherichia coli</i>                  | 1     | 10                                     |
| <i>Staphylococcus haemolyticus</i>       | 1     | 10                                     |
| <i>Klebsiella oxytoca</i>                | 1     | 10                                     |
| <i>Staphylococcus warneri</i>            | 1     | 10                                     |
| <i>Staphylococcus coagulase-negative</i> | 1     | 10                                     |

**Table S3.** antibiotic susceptibility for Gram positives and Gram negatives with respective crude rates (\*100 isolated strains).

| Year | Gram + | Gram - | G+ met R | G- amp R | G- pip/tazo R | G- genta R |
|------|--------|--------|----------|----------|---------------|------------|
| 2005 | 18     | 3      | 14 (78)  | 1 (33)   | 0             | 0          |
| 2006 | 67     | 8      | 46 (69)  | 5 (63)   | 0             | 0          |
| 2007 | 40     | 5      | 26 (65)  | 2 (40)   | 0             | 1 (20)     |
| 2008 | 27     | 8      | 21 (78)  | 6 (75)   | 0             | 0          |
| 2009 | 54     | 11     | 45 (83)  | 10 (91)  | 2 (18)        | 0          |
| 2010 | 59     | 4      | 52 (88)  | 3 (75)   | 0             | 0          |
| 2011 | 80     | 10     | 60 (75)  | 9 (90)   | 1 (10)        | 0          |
| 2012 | 119    | 18     | 93 (78)  | 16 (89)  | 3 (17)        | 1 (6)      |
| 2013 | 54     | 8      | 38 (70)  | 6 (75)   | 1 (13)        | 1 (13)     |
| 2014 | 49     | 5      | 36 (73)  | 4 (80)   | 0             | 1 (20)     |
| 2015 | 53     | 8      | 42 (79)  | 5 (63)   | 0             | 0          |
| 2016 | 44     | 9      | 25 (57)  | 1 (11)   | 3 (33)        | 3 (33)     |
| 2017 | 37     | 5      | 23 (62)  | 0        | 0             | 0          |
| 2018 | 46     | 10     | 29 (63)  | 0        | 1 (10)        | 1 (10)     |

---

numbers in parenthesis are the rate of resistant strains over 100 isolates of the same Gram stain group.
